# Supplementary material for: Racial and Ethnic Differences in Psychotropic Prescription Receipt Among Pediatric Patients Enrolled in North Carolina Medicaid
Source: Atypon-hosted journal article supplement (doi:10.1176/appi.ps.202100473), 2022-08-30
Supplement: appi.ps.202100473.ds001.pdf [file appi.ps.202100473.ds001.pdf]

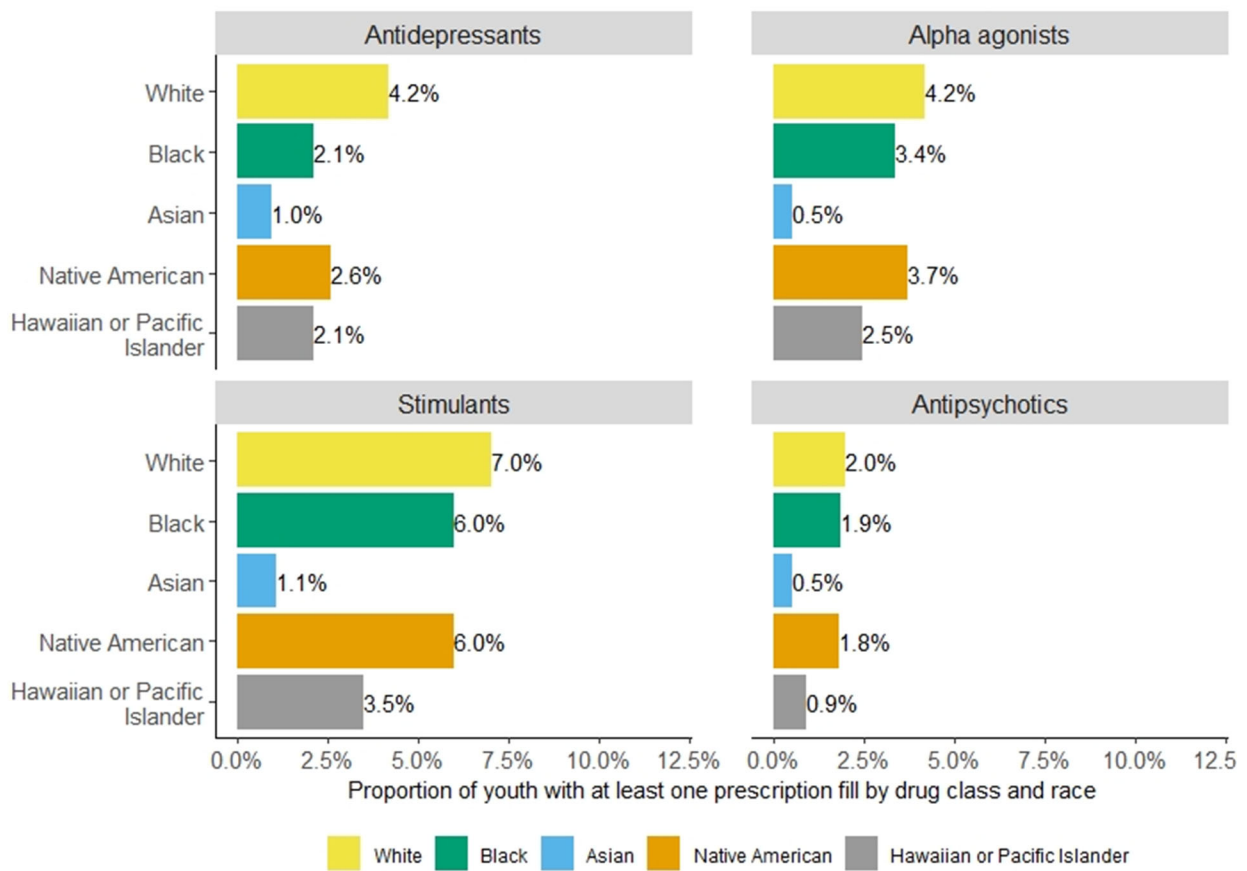

Unreported race category excluded because it is <1% of sample

Figure S1. Proportion of Medicaid-enrolled youth treated by a provider of interest<sup>a</sup> who filled at least one psychotropic medication prescription, by drug class and race.

<sup>a</sup>Child or adult psychiatric provider, pediatric provider, family medicine provider, or primary care physician assistant or nurse practitioner

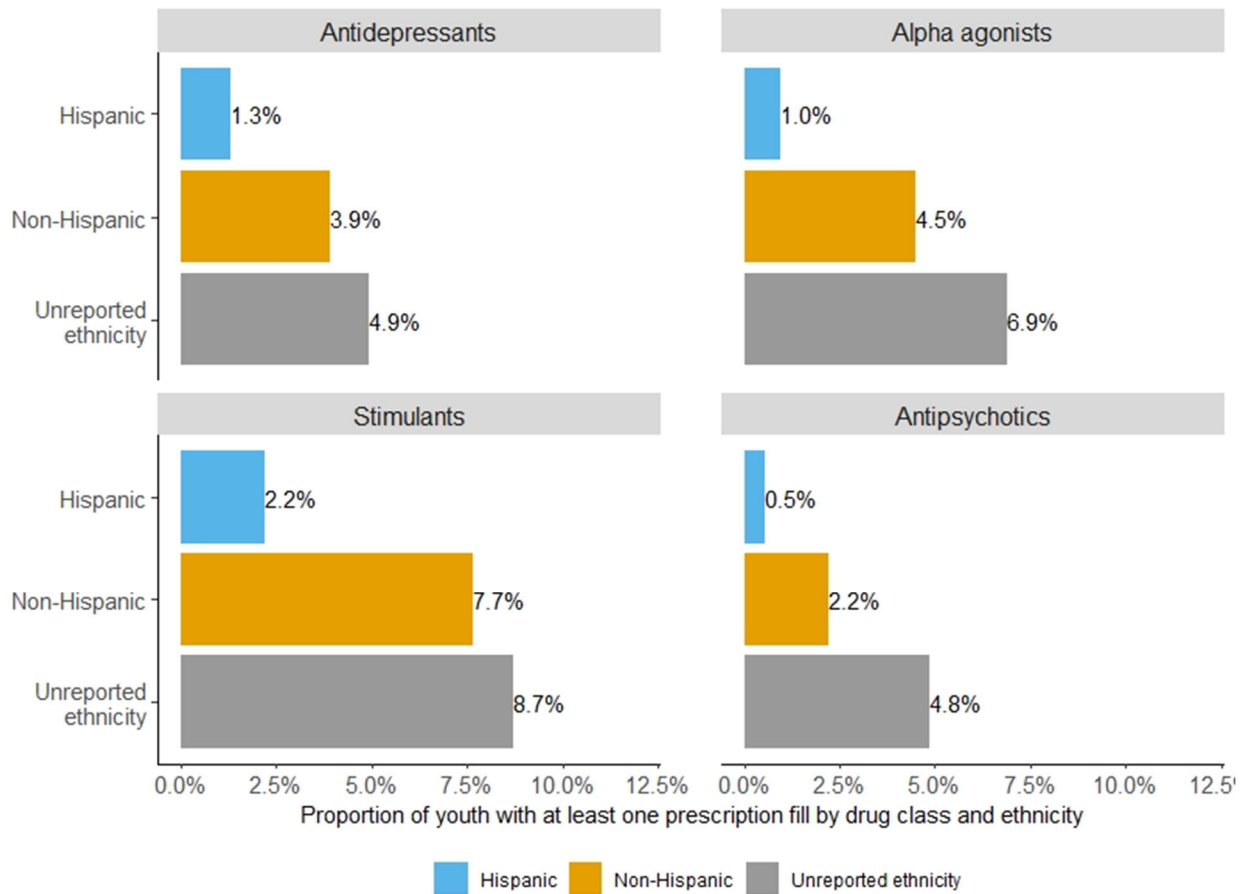

Figure S2. Proportion of Medicaid-enrolled youth treated by a provider of interest<sup>a</sup> who filled at least one psychotropic medication prescription, by drug class and ethnicity.

<sup>a</sup>Child or adult psychiatric provider, pediatric provider, family medicine provider, or primary care physician assistant or nurse practitioner

Table S1. Provider taxonomies included in the analysis.

| Provider Specialty                        | Taxonomy identifier                                                                                                              | Definition                                                                                                  |
|-------------------------------------------|----------------------------------------------------------------------------------------------------------------------------------|-------------------------------------------------------------------------------------------------------------|
| Child Psychiatry                          | MD/DO Child and Adolescent Psychiatry – 2084P0804X                                                                               | Psychiatry is defined as having specialized training/certification in psychiatry                            |
| Adult Psychiatry                          | MD/DO Psychiatry – 2084P0800X<br>MD/DO Addiction Psychiatry – 2084P0802X<br>NP, Psychiatric/Mental Health - 363LP0808X           | Psychiatry is defined as having specialized training/certification in psychiatry                            |
| Pediatrics                                | MD/DO Pediatrics 208000000X<br>NP Pediatrics - 363LP0200X<br>NP Pediatrics, Critical Care - 363LP0222X<br>NP School - 363LS0200X | Pediatrics is defined as having specialized training/certification in working with the pediatric population |
| Family Medicine                           | MD/DO Family Medicine 207Q00000X<br>MD/DO General Practice 208D00000X                                                            | Family Medicine is defined having specialized training in family medicine                                   |
| Physician Assistant Primary Care Provider | PA Physician Assistant 363A00000X                                                                                                | Non-pediatric and non-psychiatric specialty providers who provide primary care services                     |

|                                                 |                                                                                                                                                                                                                                                                                                                                                                                                                                                                           |                                                                                                |
|-------------------------------------------------|---------------------------------------------------------------------------------------------------------------------------------------------------------------------------------------------------------------------------------------------------------------------------------------------------------------------------------------------------------------------------------------------------------------------------------------------------------------------------|------------------------------------------------------------------------------------------------|
| <p>Nurse Practitioner Primary Care Provider</p> | <p>NP Acute Care -<br/>363LA2100X</p> <p>NP Adult Health -<br/>363LA2200X</p> <p>NP Community Health -<br/>363LC1500X</p> <p>NP Critical Care Medicine -<br/>363LC0200X</p> <p>NP Family - 363LF0000X</p> <p>NP Gerontology -<br/>363LG0600X</p> <p>NP Obstetrics &amp; Gynecology<br/>- 363LX0001X</p> <p>NP Occupational Health -<br/>363LX0106X</p> <p>NP Perinatal - 363LP1700X</p> <p>NP Primary Care -<br/>363LP2300X</p> <p>NP Women's Health -<br/>363LW0102X</p> | <p>Non-pediatric and non-psychiatric specialty providers who provide primary care services</p> |
|-------------------------------------------------|---------------------------------------------------------------------------------------------------------------------------------------------------------------------------------------------------------------------------------------------------------------------------------------------------------------------------------------------------------------------------------------------------------------------------------------------------------------------------|------------------------------------------------------------------------------------------------|

\*If a provider had more than one taxonomy, we assigned the provider to the taxonomy with the highest assignment priority.

Table S2. Generic drug names included in the analysis by drug class.

|                                                             |
|-------------------------------------------------------------|
| <b>Anti-Depressants (SSRIs/SNRIs/Other)</b>                 |
| <i>SSRIs</i>                                                |
| Citalopram                                                  |
| Escitalopram                                                |
| Fluoxetine                                                  |
| Paroxetine                                                  |
| Sertraline                                                  |
| Fluvoxamine (Generic Name For Luvox, Faverin, And Fluvoxin) |
| <i>SNRIs</i>                                                |
| Desvenlafaxine                                              |
| Duloxetine                                                  |
| Pristiq                                                     |
| Venlafaxine                                                 |
| Levomilnaciparin (Generic name for Fetzima)                 |
| <i>Other</i>                                                |
| Bupropion                                                   |
| Mirtazapine                                                 |
| <b>Stimulants</b>                                           |
| D-amphetamine                                               |
| Dexmethylphenidate                                          |
| Dextroamp-amphet                                            |
| Dextroamphetamine                                           |
| Methamphetamine                                             |
| Methylphenidate                                             |
| Lisdexamphetamine (Generic name for Vyvanse)                |
| <b>Alpha Agonists</b>                                       |
| Clonidine                                                   |

|                                                  |
|--------------------------------------------------|
| Guanfacine                                       |
| <b>Antipsychotics</b>                            |
| Aripiprazole                                     |
| Asenapine (Generic Name For Saphris And Sycrest) |
| Brexpiprazole (Generic Name For Rexulti)         |
| Cariprazole (Generic Name For Vraylar)           |
| Chlorpromazine                                   |
| Clozapine                                        |
| Droperidol (Generic Name For Inapsine)           |
| Fluphenazine                                     |
| Haloperidol                                      |
| Iloperidone (Generic Name For Fanapt)            |
| Loxapine                                         |
| Lurasidone (Generic Name For Latuda)             |
| Molindone (Generic Name For Moban)               |
| Olanzapine, Odt                                  |
| Olanzapine-fluoxetine (Generic Name For Symbyax) |
| Paliperidone                                     |
| Perphenazine (Generic Name For Trilafon)         |
| Pimozide                                         |
| Prochlorperazine                                 |
| Quetiapine Er, Fumarate                          |
| Risperidone                                      |
| Thiothixene                                      |
| Thioridazine (Generic Name For Mellaril)         |
| Trifluoperazine                                  |
| Ziprasidone                                      |

Table S3. Unadjusted and adjusted risk ratios between variables and risk of filling psychotropic medication prescription

| Predictor  | Any psychotropic prescription |                      | Antidepressant       |                      | Alpha agonist        |                      | Stimulant            |                      | Antipsychotic        |                      |
|------------|-------------------------------|----------------------|----------------------|----------------------|----------------------|----------------------|----------------------|----------------------|----------------------|----------------------|
|            | RR (95% CI)                   | ARR (95% CI)         | RR (95% CI)          | ARR (95% CI)         | RR (95% CI)          | ARR (95% CI)         | RR (95% CI)          | ARR (95% CI)         | RR (95% CI)          | ARR (95% CI)         |
| Age, years |                               |                      |                      |                      |                      |                      |                      |                      |                      |                      |
| 0-5        | 0.05<br>(0.05, 0.06)          | 0.06<br>(0.06, 0.06) | 0.01<br>(0.01, 0.01) | 0.01<br>(0.01, 0.01) | 0.11<br>(0.10, 0.11) | 0.13<br>(0.12, 0.13) | 0.05<br>(0.05, 0.05) | 0.05<br>(0.05, 0.06) | 0.03<br>(0.03, 0.03) | 0.04<br>(0.03, 0.04) |
| 6-11       | 0.81<br>(0.80, 0.82)          | 0.85<br>(0.84, 0.86) | 0.27<br>(0.26, 0.27) | 0.28<br>(0.27, 0.29) | 1.02<br>(1.00, 1.04) | 1.10<br>(1.08, 1.12) | 1.13<br>(1.11, 1.15) | 1.17<br>(1.15, 1.19) | 0.49<br>(0.47, 0.50) | 0.54<br>(0.52, 0.56) |
| 12-17      | Ref.                          | Ref.                 | Ref.                 | Ref.                 | Ref.                 | Ref.                 | Ref.                 | Ref.                 | Ref.                 | Ref.                 |
| 18-21      | 0.92<br>(0.90, 0.94)          | 0.88<br>(0.86, 0.89) | 1.53<br>(1.50, 1.57) | 1.40<br>(1.36, 1.43) | 0.44<br>(0.42, 0.46) | 0.41<br>(0.39, 0.43) | 0.44<br>(0.42, 0.45) | 0.43<br>(0.42, 0.45) | 1.32<br>(1.27, 1.37) | 1.14<br>(1.10, 1.19) |
| Sex        |                               |                      |                      |                      |                      |                      |                      |                      |                      |                      |
| Female     | 0.64<br>(0.63, 0.64)          | 0.66<br>(0.65, 0.67) | 1.34<br>(1.31, 1.37) | 1.31<br>(1.28, 1.34) | 0.43<br>(0.42, 0.44) | 0.48<br>(0.47, 0.49) | 0.45<br>(0.45, 0.46) | 0.48<br>(0.47, 0.49) | 0.61<br>(0.60, 0.63) | 0.70<br>(0.68, 0.72) |
| Male       | Ref.                          | Ref.                 | Ref.                 | Ref.                 | Ref.                 | Ref.                 | Ref.                 | Ref.                 | Ref.                 | Ref.                 |
| Race       |                               |                      |                      |                      |                      |                      |                      |                      |                      |                      |
| White      | Ref.                          | Ref.                 | Ref.                 | Ref.                 | Ref.                 | Ref.                 | Ref.                 | Ref.                 | Ref.                 | Ref.                 |
| Black      | 0.85<br>(0.83, 0.86)          | 0.61<br>(0.60, 0.62) | 0.57<br>(0.55, 0.58) | 0.40<br>(0.39, 0.41) | 0.88<br>(0.86, 0.91) | 0.61<br>(0.60, 0.63) | 0.91<br>(0.89, 0.93) | 0.67<br>(0.65, 0.68) | 0.94<br>(0.91, 0.97) | 0.63<br>(0.61, 0.66) |

| Predictor                    | Any psychotropic prescription |                      | Antidepressant       |                      | Alpha agonist        |                      | Stimulant            |                      | Antipsychotic        |                      |
|------------------------------|-------------------------------|----------------------|----------------------|----------------------|----------------------|----------------------|----------------------|----------------------|----------------------|----------------------|
|                              | RR (95% CI)                   | ARR (95% CI)         | RR (95% CI)          | ARR (95% CI)         | RR (95% CI)          | ARR (95% CI)         | RR (95% CI)          | ARR (95% CI)         | RR (95% CI)          | ARR (95% CI)         |
| Asian                        | 0.22<br>(0.20, 0.24)          | 0.20<br>(0.18, 0.22) | 0.25<br>(0.22, 0.29) | 0.25<br>(0.22, 0.29) | 0.15<br>(0.12, 0.18) | 0.14<br>(0.11, 0.17) | 0.18<br>(0.16, 0.21) | 0.16<br>(0.14, 0.19) | 0.27<br>(0.22, 0.33) | 0.29<br>(0.24, 0.36) |
| Native American              | 0.86<br>(0.82, 0.91)          | 0.73<br>(0.69, 0.77) | 0.72<br>(0.65, 0.80) | 0.62<br>(0.56, 0.69) | 0.89<br>(0.82, 0.98) | 0.74<br>(0.68, 0.81) | 0.89<br>(0.83, 0.95) | 0.75<br>(0.70, 0.80) | 0.79<br>(0.69, 0.89) | 0.65<br>(0.57, 0.73) |
| Hawaiian or Pacific Islander | 0.54<br>(0.45, 0.66)          | 0.64<br>(0.53, 0.77) | 0.53<br>(0.38, 0.73) | 0.65<br>(0.47, 0.90) | 0.59<br>(0.43, 0.79) | 0.69<br>(0.51, 0.94) | 0.50<br>(0.39, 0.64) | 0.56<br>(0.44, 0.73) | 0.40<br>(0.24, 0.65) | 0.50<br>(0.31, 0.82) |
| Unreported race              | 0.62<br>(0.57, 0.68)          | 0.56<br>(0.51, 0.61) | 0.59<br>(0.51, 0.69) | 0.44<br>(0.38, 0.52) | 0.53<br>(0.45, 0.62) | 0.51<br>(0.44, 0.60) | 0.52<br>(0.46, 0.59) | 0.55<br>(0.48, 0.62) | 0.83<br>(0.70, 1.00) | 0.51<br>(0.42, 0.61) |
| Ethnicity                    |                               |                      |                      |                      |                      |                      |                      |                      |                      |                      |
| Non-Hispanic                 | Ref.                          | Ref.                 | Ref.                 | Ref.                 | Ref.                 | Ref.                 | Ref.                 | Ref.                 | Ref.                 | Ref.                 |
| Hispanic                     | 0.32<br>(0.31, 0.32)          | 0.29<br>(0.28, 0.29) | 0.34<br>(0.33, 0.35) | 0.30<br>(0.29, 0.32) | 0.21<br>(0.19, 0.24) | 0.22<br>(0.21, 0.23) | 0.30<br>(0.29, 0.31) | 0.26<br>(0.25, 0.27) | 0.25<br>(0.23, 0.26) | 0.29<br>(0.27, 0.30) |
| Unreported ethnicity         | 1.32<br>(1.27, 1.37)          | 0.83<br>(0.79, 0.86) | 1.31<br>(1.23, 1.41) | 0.80<br>(0.74, 0.86) | 1.53<br>(1.38, 1.70) | 0.83<br>(0.78, 0.88) | 1.19<br>(1.13, 1.25) | 0.84<br>(0.80, 0.89) | 2.22<br>(2.07, 2.38) | 0.86<br>(0.80, 0.92) |
| County of residence          |                               |                      |                      |                      |                      |                      |                      |                      |                      |                      |
| Rural                        | 1.01<br>(0.93, 1.10)          | 0.97<br>(0.92, 1.03) | 0.89<br>(0.78, 1.02) | 0.86<br>(0.80, 0.93) | 1.02<br>(0.90, 1.15) | 0.99<br>(0.90, 1.09) | 1.02<br>(0.93, 1.12) | 0.98<br>(0.91, 1.07) | 1.02<br>(0.87, 1.20) | 0.90<br>(0.81, 1.00) |



| Predictor                        | Any psychotropic prescription |                   | Antidepressant    |                   | Alpha agonist     |                   | Stimulant         |                   | Antipsychotic        |                   |
|----------------------------------|-------------------------------|-------------------|-------------------|-------------------|-------------------|-------------------|-------------------|-------------------|----------------------|-------------------|
|                                  | RR (95% CI)                   | ARR (95% CI)      | RR (95% CI)       | ARR (95% CI)      | RR (95% CI)       | ARR (95% CI)      | RR (95% CI)       | ARR (95% CI)      | RR (95% CI)          | ARR (95% CI)      |
| Urban                            | Ref.                          | Ref.              | Ref.              | Ref.              | Ref.              | Ref.              | Ref.              | Ref.              | Ref.                 | Ref.              |
| Medicaid eligibility program     |                               |                   |                   |                   |                   |                   |                   |                   |                      |                   |
| Blind/ disabled/ medically needy | 3.73 (3.67, 3.80)             | 2.67 (2.63, 2.72) | 3.82 (3.71, 3.94) | 2.66 (2.58, 2.74) | 6.09 (5.94, 6.25) | 4.60 (4.48, 4.72) | 2.96 (2.90, 3.03) | 2.19 (2.14, 2.24) | 10.55 (10.22, 10.90) | 6.95 (6.72, 7.19) |
| Income child                     | Ref.                          | Ref.              | Ref.              | Ref.              | Ref.              | Ref.              | Ref.              | Ref.              | Ref.                 | Ref.              |
| Foster care/adoption             | 3.66 (3.57, 3.75)             | 2.78 (2.71, 2.85) | 3.99 (3.83, 4.16) | 3.11 (2.99, 3.25) | 5.98 (5.77, 6.19) | 4.45 (4.30, 4.61) | 3.44 (3.33, 3.55) | 2.55 (2.47, 2.63) | 8.68 (8.28, 9.10)    | 6.52 (6.21, 6.83) |
| Pregnant women                   | 0.63 (0.46, 0.85)             | 0.54 (0.40, 0.73) | 1.80 (1.30, 2.48) | 0.54 (0.39, 0.75) | 0.05 (0.01, 0.35) | 0.29 (0.09, 0.99) | 0.09 (0.04, 0.25) | 0.27 (0.11, 0.64) | 0.60 (0.25, 1.44)    | 0.36 (0.15, 0.83) |
| Other                            | 0.26 (0.22, 0.30)             | 0.23 (0.20, 0.27) | 0.44 (0.35, 0.54) | 0.25 (0.20, 0.31) | 0.12 (0.08, 0.18) | 0.14 (0.09, 0.22) | 0.12 (0.09, 0.17) | 0.15 (0.11, 0.20) | 0.55 (0.41, 0.74)    | 0.41 (0.31, 0.56) |

Abbreviations: RR, unadjusted rate ratio; ARR, adjusted rate ratio; CI, confidence interval; Ref., reference group

All models include a random intercept for enrollee’s county of residence. Adjusted models include all variables in the left column as covariates.
